# Supplementary material
Source: MDPI journal article supplement (https://www.mdpi.com/2313-433X/9/3/73)
Supplement: s1 [file s1]

## ARAM Questionnaire

|      |                                                                                                  | Strongly<br>Disagree |                       |                       |                       |                       |                       | Strongly<br>Agree     |                       |
|------|--------------------------------------------------------------------------------------------------|----------------------|-----------------------|-----------------------|-----------------------|-----------------------|-----------------------|-----------------------|-----------------------|
|      |                                                                                                  | ← ...                | 1                     | 2                     | 3                     | 4                     | 5                     | 6                     | ... →                 |
|      |                                                                                                  |                      | 1                     | 2                     | 3                     | 4                     | 5                     | 6                     | 7                     |
| [1]  | Using augmented reality may help me get more information about the archaeological space.         |                      | <input type="radio"/> |
| [2]  | Using augmented reality may help me get information about the archaeological space more quickly. |                      | <input type="radio"/> |
| [3]  | Using augmented reality may increase my interest in archaeological spaces.                       |                      | <input type="radio"/> |
|      |                                                                                                  |                      |                       |                       |                       |                       |                       |                       |                       |
|      |                                                                                                  | Strongly<br>Disagree |                       |                       |                       |                       |                       | Strongly<br>Agree     |                       |
|      |                                                                                                  | ← ...                | 1                     | 2                     | 3                     | 4                     | 5                     | 6                     | ... →                 |
|      |                                                                                                  |                      | 1                     | 2                     | 3                     | 4                     | 5                     | 6                     | 7                     |
| [4]  | I think that augmented reality is easy to use.                                                   |                      | <input type="radio"/> |
| [5]  | I think that my interaction with augmented reality will be clear and understandable.             |                      | <input type="radio"/> |
| [6]  | It will be easy for me to become skilful at using augmented reality.                             |                      | <input type="radio"/> |
|      |                                                                                                  |                      |                       |                       |                       |                       |                       |                       |                       |
|      |                                                                                                  | Strongly<br>Disagree |                       |                       |                       |                       |                       | Strongly<br>Agree     |                       |
|      |                                                                                                  | ← ...                | 1                     | 2                     | 3                     | 4                     | 5                     | 6                     | ... →                 |
|      |                                                                                                  |                      | 1                     | 2                     | 3                     | 4                     | 5                     | 6                     | 7                     |
| [10] | I have the resources necessary to use augmented reality (e.g. smartphone).                       |                      | <input type="radio"/> |
| [11] | I have the knowledge necessary to use augmented reality.                                         |                      | <input type="radio"/> |
| [12] | Augmented reality is compatible with other technologies I use.                                   |                      | <input type="radio"/> |
| [13] | I can get help from others if I have difficulties using augmented reality.                       |                      | <input type="radio"/> |
|      |                                                                                                  |                      |                       |                       |                       |                       |                       |                       |                       |
|      |                                                                                                  | Strongly<br>Disagree |                       |                       |                       |                       |                       | Strongly<br>Agree     |                       |
|      |                                                                                                  | ← ...                | 1                     | 2                     | 3                     | 4                     | 5                     | 6                     | ... →                 |
|      |                                                                                                  |                      | 1                     | 2                     | 3                     | 4                     | 5                     | 6                     | 7                     |
| [14] | Using augmented reality in archaeological spaces can be fun.                                     |                      | <input type="radio"/> |
| [15] | Using augmented reality in archaeological spaces can be exciting.                                |                      | <input type="radio"/> |
| [16] | I think that I will feel like I am in control of the augmented reality experience.               |                      | <input type="radio"/> |

|      |                                                                                                                                                      | Strongly<br>Disagree |                       |                       |                       |                       | Strongly<br>Agree     |                       |                       |
|------|------------------------------------------------------------------------------------------------------------------------------------------------------|----------------------|-----------------------|-----------------------|-----------------------|-----------------------|-----------------------|-----------------------|-----------------------|
|      |                                                                                                                                                      | ← ...                | 1                     | 2                     | 3                     | 4                     | 5                     | 6                     | ... →                 |
| [17] | I feel nervous about using augmented reality.                                                                                                        |                      | <input type="radio"/> |
| [18] | I feel insecure about my ability to use augmented reality.                                                                                           |                      | <input type="radio"/> |
| [19] | I'm afraid to use augmented reality for fear of making mistakes that I cannot correct.                                                               |                      | <input type="radio"/> |
|      |                                                                                                                                                      |                      |                       |                       |                       |                       |                       |                       |                       |
|      |                                                                                                                                                      | Strongly<br>Disagree |                       |                       |                       |                       |                       | Strongly<br>Agree     |                       |
|      |                                                                                                                                                      | ← ...                | 1                     | 2                     | 3                     | 4                     | 5                     | 6                     | ... →                 |
| [20] | Augmented reality applied to archaeological spaces may be credible.                                                                                  |                      | <input type="radio"/> |
| [21] | Augmented reality applied to archaeological spaces may be reliable.                                                                                  |                      | <input type="radio"/> |
| [22] | Augmented reality applied to archaeological spaces may be trustworthy.                                                                               |                      | <input type="radio"/> |
|      |                                                                                                                                                      |                      |                       |                       |                       |                       |                       |                       |                       |
|      |                                                                                                                                                      | Strongly<br>Disagree |                       |                       |                       |                       |                       | Strongly<br>Agree     |                       |
|      |                                                                                                                                                      | ← ...                | 1                     | 2                     | 3                     | 4                     | 5                     | 6                     | ... →                 |
| [23] | In addition to seeing virtual images with augmented reality, I would like to listen to sounds related to the archaeological space.                   |                      | <input type="radio"/> |
| [24] | In addition to seeing virtual images with augmented reality, I would like to smell aromas related to the archaeological space.                       |                      | <input type="radio"/> |
| [25] | In addition to seeing virtual images with augmented reality, I would like to feel sensations (e.g. temperature) related to the archaeological space. |                      | <input type="radio"/> |
| [26] | With augmented reality I will be able to explore archaeological spaces in a way that wouldn't be possible without it.                                |                      | <input type="radio"/> |

|      |                                                                                     | Strongly<br>Disagree  |                       |                       |                       |                       | Strongly<br>Agree     |
|------|-------------------------------------------------------------------------------------|-----------------------|-----------------------|-----------------------|-----------------------|-----------------------|-----------------------|
|      |                                                                                     | ← ...                 |                       |                       |                       | ... →                 |                       |
|      |                                                                                     | 1                     | 2                     | 3                     | 4                     | 5                     | 6 7                   |
| [27] | I would like to use augmented reality in archaeological spaces as soon as possible. | <input type="radio"/> |
| [28] | I plan to use augmented reality applied to archaeological sites in the future.      | <input type="radio"/> |
| [29] | I will always try to use augmented reality when visiting archaeological sites.      | <input type="radio"/> |

|      |                                                                                | Very<br>Bad           |                       |                       |                       |                       | Very<br>Good          |
|------|--------------------------------------------------------------------------------|-----------------------|-----------------------|-----------------------|-----------------------|-----------------------|-----------------------|
|      |                                                                                | ← ...                 |                       |                       |                       | ... →                 |                       |
|      |                                                                                | 1                     | 2                     | 3                     | 4                     | 5                     | 6 7                   |
| [30] | I classify my level of knowledge related to archaeology as:                    | <input type="radio"/> |
| [31] | I classify my level of knowledge related to how to use augmented reality as:   | <input type="radio"/> |
| [32] | I classify my level of reading of English to understand this questionnaire as: | <input type="radio"/> |
